# Supplementary material
Source: PubMed Central journal article supplement (PMC4933127)
Supplement: supp_JCO.2015.62.3504_DS_2015.623504.pdf [file supp_JCO.2015.62.3504_DS_2015.623504.pdf]

**Annual Hazard rates of recurrence for breast cancer during 24 years of follow-up:  
results from the International Breast Cancer Study Group**

**Colleoni, et. al.**

**Table S1. Trials I-IV (1978-1981)**

| <b>Trial</b>                  | <b>Population</b>     | <b>Eligible Patients</b> | <b>Design</b>                     | <b>Median F-U Yrs.</b> |
|-------------------------------|-----------------------|--------------------------|-----------------------------------|------------------------|
| <b>I</b> <sup>1,2</sup>       | Premeno<br>1-3 N+     | 491                      | CMF vs. CMFp                      | 26                     |
| <b>II</b> <sup>2,3</sup>      | Premeno<br>4+N+       | 327                      | CMFp vs. Ox→CMFp                  | 27                     |
| <b>III</b> <sup>2,4,5,6</sup> | Postmeno<br>Age ≤65   | 463                      | Observation vs. p+T vs.<br>CMFp+T | 26                     |
| <b>IV</b> <sup>2,5,6,7</sup>  | Postmeno<br>Age 66-80 | 320                      | Observation vs. p+T               | 27                     |

CMF (28-day cycles) x 12 cycles

C: Cyclophosphamide 100 mg/m<sup>2</sup> p.o. days 1-14  
M: Methotrexate 40 mg/m<sup>2</sup> i.v. days 1 & 8  
F: 5-Fluorouracil 600 mg/m<sup>2</sup> i.v. days 1 & 8  
p: Prednisone 7.5 mg/m<sup>2</sup> p.o. daily x 12 months  
T: Tamoxifen 20 mg p.o. daily x 12 months  
Ox: Surgical oophorectomy

**Table S2. Trial V—Three Populations (1981-1985)**

| <b>Trial</b>                     | <b>Population</b>              | <b>Eligible Patients</b> | <b>Design</b>                                    | <b>Median F-U Yrs.</b> |
|----------------------------------|--------------------------------|--------------------------|--------------------------------------------------|------------------------|
| <b>V/N-negative</b> <sup>8</sup> | Pre/post meno<br>Node negative | 1275                     | Observation vs. PeCMF                            | 23                     |
| <b>V/N-positive</b> <sup>9</sup> | Premeno<br>Node positive       | 715                      | PeCMF vs.<br>PeCMF+ConCMF vs.<br>ConCMF          | 22                     |
| <b>V/N-positive</b> <sup>9</sup> | Postmeno<br>Node positive      | 514                      | PeCMF vs.<br>PeCMF+ConCMF+pT<br>vs.<br>ConCMF+pT | 22                     |

ConCMF—Conventionally-timed CMF (28-day cycles) x 6 cycles

C: Cyclophosphamide 100 mg/m<sup>2</sup> p.o. days 1-14  
M: Methotrexate 40 mg/m<sup>2</sup> i.v. days 1 & 8  
F: 5-Fluorouracil 600 mg/m<sup>2</sup> i.v. days 1 & 8  
p: Prednisone 7.5 mg/m<sup>2</sup> p.o. daily x 6 months  
T: Tamoxifen 20 mg p.o. daily x 6 months

PeCMF—Perioperative CMF (28-day cycles) x 1 cycle

Begin within 36 hours after mastectomy

C: Cyclophosphamide 400 mg/m<sup>2</sup> i.v. days 1 & 8  
M: Methotrexate 40 mg/m<sup>2</sup> i.v. days 1 & 8  
F: 5-Fluorouracil 600 mg/m<sup>2</sup> i.v. days 1 & 8  
Leucovorin® 15 mg i.v. 24 hours after Day 1  
15 mg p.o. 24 hours after Day 8

**Table S3. Duration of follow-up for 485 patients who died without breast cancer recurrence and for 1169 patients who were last known to be alive without recurrence**

|                                                                                        | Year     |           |           |           |           |           | Total       |
|----------------------------------------------------------------------------------------|----------|-----------|-----------|-----------|-----------|-----------|-------------|
|                                                                                        | 0-5      | 5-10      | 10-15     | 15-20     | 20-25     | 25+       |             |
|                                                                                        | N (%)    | N (%)     | N (%)     | N (%)     | N (%)     | N (%)     | N (%)       |
| Duration of follow-up for patients who died without recurrence                         | 88 (18%) | 60 (12%)  | 86 (18%)  | 125 (26%) | 95 (20%)  | 31 (6%)   | 485 (100%)  |
| Duration of follow-up for patients who were last known to be alive without recurrence* | 24 (2%)  | 114 (10%) | 135 (12%) | 98 (8%)   | 411 (35%) | 387 (33%) | 1169 (100%) |

\* Among the 1169 patients who were last known to be alive without recurrence, 88%, 76%, 68%, and 33% were followed for at least 10, 15, 20, and 25 years, respectively.

**Figure S1. Cumulative Incidence plot of local/regional as the first site of recurrence, with recurrences in other sites and deaths without recurrence considered as competing events.**

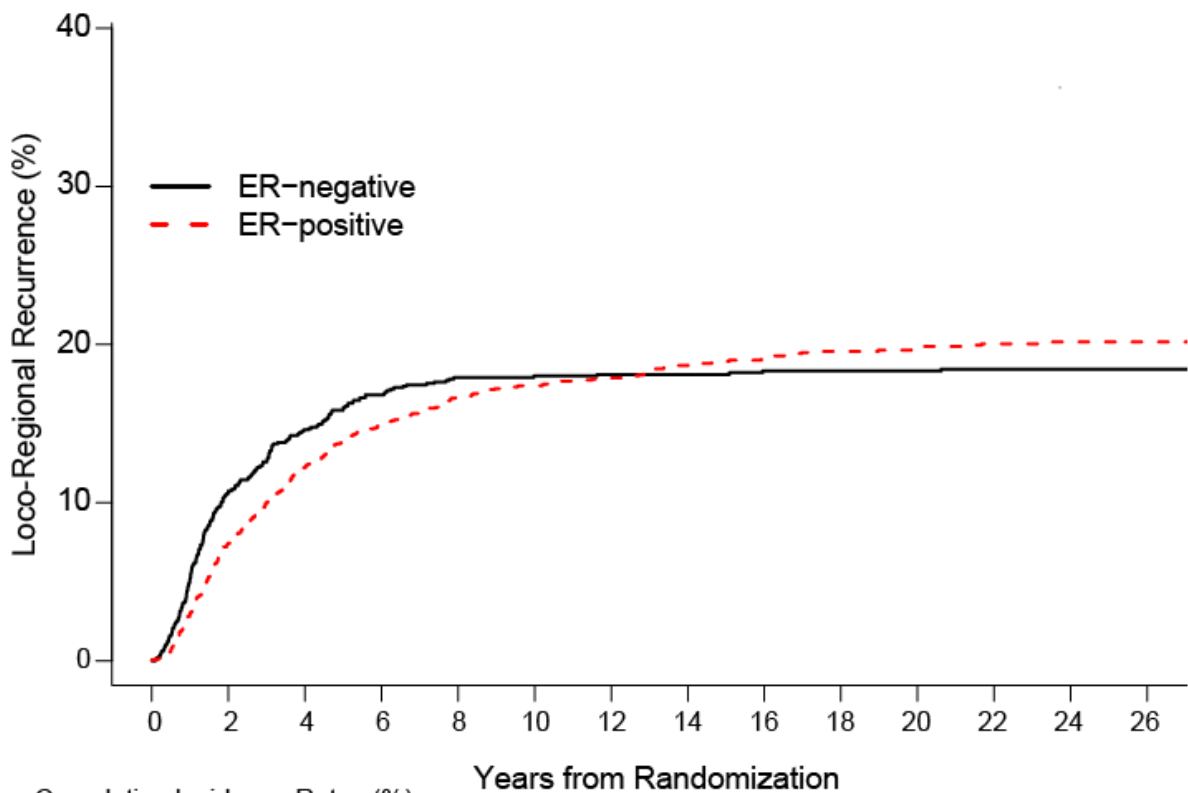

Cumulative Incidence Rates (%)

| Years from Randomization | ER- (%) | ER+ (%) |
|--------------------------|---------|---------|
| 0                        | 0.0     | 0.0     |
| 2                        | 10.7    | 7.4     |
| 4                        | 14.6    | 12.2    |
| 6                        | 16.8    | 15.0    |
| 8                        | 17.9    | 16.7    |
| 10                       | 18.0    | 17.4    |
| 12                       | 18.1    | 17.9    |
| 14                       | 18.1    | 18.7    |
| 16                       | 18.3    | 19.1    |
| 18                       | 18.3    | 19.6    |
| 20                       | 18.3    | 19.9    |
| 22                       | 18.4    | 20.0    |
| 24                       | 18.4    | 20.2    |
| 26                       | 18.4    | 20.2    |

## References

1. Ludwig Breast Cancer Study Group. A randomized trial of adjuvant combination chemotherapy with or without prednisone in premenopausal breast cancer patients with metastases in one to three axillary lymph nodes. *Cancer Res* 45:4454-4459, 1985
2. Castiglione-Gertsch M, Johnsen C, Goldhirsch A, Gelber RD, Rudenstam CM, Collins J, Lindtner J, Hacking A, Cortes-Funes, Forbes J, Simpson J, Tattersall MHN, Brunner K, Cavalli F, Senn HJ for the International Breast Cancer Study Group. The International (Ludwig) Breast Cancer Study Group Trials I-IV: 15 years follow-up. *Ann Oncol* 5:717-724, 1994
3. Ludwig Breast Cancer Study Group. Chemotherapy with or without oophorectomy in high-risk premenopausal patients with operable breast cancer. *J Clin Oncol* 3:1059-1067, 1985
4. Ludwig Breast Cancer Study Group. Randomised trial of chemoendocrine therapy, endocrine therapy, and mastectomy alone in postmenopausal patients with operable breast cancer and axillary node metastasis. *Lancet* i:1256-1260, 1984
5. Castiglione M, Gelber RD, Goldhirsch A. Adjuvant systemic therapy for breast cancer in the elderly: competing causes of mortality. *J Clin Oncol* 8:519-526, 1990
6. Paganì O, Price KN, Gelber RD, Castiglione-Gertsch M, Holmberg SB, Lindtner J, Thürlimann B, Collins J, Fey MF, Coates AS, Goldhirsch A for the IBCSG. Patterns of recurrence of early breast cancer according to estrogen-receptor status: A therapeutic target for a quarter of a century. *Breast Cancer Res Treat* 117:319–324, 2009
7. Crivellari D, Price K, Gelber RD, Castiglione-Gertsch M, Rudenstam CM, Lindtner J, Fey MF, Senn HJ, Coates AS, Collins J, Goldhirsch A for the IBCSG. Adjuvant endocrine therapy compared with no systemic therapy for elderly women with early breast cancer: 21-year results of International Breast Cancer Study Group Trial IV. *J Clin Oncol* 21:4517-23, 2003
8. Ludwig Breast Cancer Study Group. Prolonged disease-free survival after one course of perioperative adjuvant chemotherapy for node-negative breast cancer. *N Engl J Med* 320:491-496, 1989
9. Ludwig Breast Cancer Study Group. Combination adjuvant chemotherapy for node-positive breast cancer. Inadequacy of a single perioperative cycle. *N Engl J Med* 319:677-683, 1988
